# Supplementary material
Source: publisher site journal article supplement (http://www.kjim.org/upload/media/kjim-2016-223-suppl7.pdf)
Supplement: Supplementary file 1 [file kjim-2016-223-suppl7.pdf]

**Supplementary Table 7. Association between nutrients intake and the risk of symptom at 3 months after laparoscopic cholecystectomy by multivariable logistic regression analysis**

| Variable                         | Quartile of dietary intake |                    |                    | p for trend <sup>a</sup> |
|----------------------------------|----------------------------|--------------------|--------------------|--------------------------|
|                                  | Q1                         | Q2                 | Q3                 |                          |
| <b>Carbohydrate, g</b>           |                            |                    |                    |                          |
| Number of S/A                    | 13/10                      | 8/11               | 6/11               |                          |
| Cut-off                          | ≤ 218.4                    | 218.4 < to ≤ 282.2 | > 282.2            | 0.116                    |
| OR (95% CI) <sup>b</sup>         | 1                          | 0.479 (0.11–2.07)  | 0.244 (0.04–1.42)  |                          |
| <b>Lipid, g</b>                  |                            |                    |                    |                          |
| Number of S/A                    | 12/10                      | 6/11               | 9/11               |                          |
| Cut-off                          | ≤ 33.4                     | 33.4 < to ≤ 45.4   | > 45.4             | 0.612                    |
| OR (95% CI)                      | 1                          | 0.476 (0.11–1.98)  | 0.728 (0.13–4.05)  |                          |
| <b>Protein, g</b>                |                            |                    |                    |                          |
| Number of S/A                    | 8/11                       | 3/9                | 16/12              |                          |
| Cut-off                          | ≤ 47.1                     | 47.1 < to ≤ 66.5   | > 66.5             | 0.052                    |
| OR (95% CI)                      | 1                          | 0.727 (0.12–4.29)  | 4.576 (0.90–23.17) |                          |
| <b>Plant protein, g</b>          |                            |                    |                    |                          |
| Number of S/A                    | 15/10                      | 5/11               | 7/11               |                          |
| Cut-off                          | ≤ 29.4                     | 29.4 < to ≤ 38.1   | > 38.1             | 0.456                    |
| OR (95% CI)                      | 1                          | 0.238 (0.05–1.09)  | 0.568 (0.13–2.54)  |                          |
| <b>Fiber, g</b>                  |                            |                    |                    |                          |
| Number of S/A                    | 12/11                      | 11/10              | 4/11               |                          |
| Cut-off                          | ≤ 16.7                     | 16.7 < to ≤ 23.8   | > 23.8             | 0.137                    |
| OR (95% CI)                      | 1                          | 1.329 (0.36–4.87)  | 0.333 (0.07–1.68)  |                          |
| <b>Vitamin A, µg RE</b>          |                            |                    |                    |                          |
| Number of S/A                    | 9/10                       | 9/11               | 9/11               |                          |
| Cut-off                          | ≤ 420.0                    | 420.0 < to ≤ 891.9 | > 891.9            | 0.614                    |
| OR (95% CI)                      | 1                          | 0.642 (0.16–2.52)  | 0.652 (0.16–2.70)  |                          |
| <b>Vitamin D, µg</b>             |                            |                    |                    |                          |
| Number of S/A                    | 5/10                       | 7/11               | 15/11              |                          |
| Cut-off                          | ≤ 0.2                      | 0.2 < to ≤ 1.5     | > 1.5              | 0.062                    |
| OR (95% CI)                      | 1                          | 1.258 (0.26–6.14)  | 3.544 (0.79–15.98) |                          |
| <b>Vitamin E, mg</b>             |                            |                    |                    |                          |
| Number of S/A                    | 11/10                      | 10/11              | 6/11               |                          |
| Cut-off                          | ≤ 10.5                     | 10.5 < to ≤ 17.2   | > 17.2             | 0.249                    |
| OR (95% CI)                      | 1                          | 0.799 (0.22–2.91)  | 0.380 (0.08–1.78)  |                          |
| <b>Vitamin K, µg</b>             |                            |                    |                    |                          |
| Number of S/A                    | 11/11                      | 7/10               | 9/11               |                          |
| Cut-off                          | ≤ 94.3                     | 94.3 < to ≤ 205.5  | > 205.5            | 0.756                    |
| OR (95% CI)                      | 1                          | 0.603 (0.15–2.43)  | 0.778 (0.21–2.86)  |                          |
| <b>Thiamin, mg</b>               |                            |                    |                    |                          |
| Number of S/A                    | 11/10                      | 8/11               | 8/11               |                          |
| Cut-off                          | ≤ 0.9                      | 0.9 < to ≤ 1.2     | > 1.2              | 0.600                    |
| OR (95% CI)                      | 1                          | 0.762 (0.20–2.96)  | 0.675 (0.15–30.00) |                          |
| <b>Vitamin B<sub>6</sub>, mg</b> |                            |                    |                    |                          |
| Number of S/A                    | 14/11                      | 9/11               | 4/10               |                          |

Supplementary Table 7. Continued

| Variable                     | Quartile of dietary intake |                        |                    | p for trend <sup>a</sup> |
|------------------------------|----------------------------|------------------------|--------------------|--------------------------|
|                              | Q1                         | Q2                     | Q3                 |                          |
| Cut-off                      | ≤ 1.1                      | 1.1 < to ≤ 1.7         | > 1.7              | 0.203                    |
| OR (95% CI)                  | 1                          | 0.667 (0.19–2.38)      | 0.342 (0.07–1.70)  |                          |
| Folate, µg                   |                            |                        |                    |                          |
| Number of S/A                | 12/10                      | 10/11                  | 5/11               |                          |
| Cut-off                      | ≤ 326.6                    | 326.6 < to ≤ 526.2     | > 526.2            | 0.183                    |
| OR (95% CI)                  | 1                          | 0.803 (0.22–2.92)      | 0.357 (0.08–1.64)  |                          |
| Vitamin B <sub>12</sub> , µg |                            |                        |                    |                          |
| Number of S/A                | 10/10                      | 9/11                   | 8/11               |                          |
| Cut-off                      | ≤ 5.2                      | 5.2 < to ≤ 9.5         | > 9.5              | 0.887                    |
| OR (95% CI)                  | 1                          | 0.866 (0.22–3.37)      | 0.886 (0.23–3.48)  |                          |
| Vitamin C, mg                |                            |                        |                    |                          |
| Number of S/A                | 17/10                      | 4/13                   | 6/9                |                          |
| Cut-off                      | ≤ 82.8                     | 82.8 < to ≤ 133.9      | > 133.9            | 0.089                    |
| OR (95% CI)                  | 1                          | 0.238 (0.06–1.01)      | 0.355 (0.09–1.47)  |                          |
| Calcium, mg                  |                            |                        |                    |                          |
| Number of S/A                | 14/11                      | 5/9                    | 8/12               |                          |
| Cut-off                      | ≤ 372.4                    | 372.4 < to ≤ 457.6     | > 457.6            | 0.374                    |
| OR (95% CI)                  | 1                          | 0.520 (0.12–2.30)      | 0.524 (0.14–1.97)  |                          |
| Phosphorus, mg               |                            |                        |                    |                          |
| Number of S/A                | 10/10                      | 10/11                  | 7/11               |                          |
| Cut-off                      | ≤ 759.3                    | 759.3 < to ≤ 1,041.6   | > 1,041.6          | 0.927                    |
| OR (95% CI)                  | 1                          | 1.655 (0.40–6.61)      | 0.995 (0.19–5.23)  |                          |
| Sodium, mg                   |                            |                        |                    |                          |
| Number of S/A                | 14/10                      | 5/11                   | 8/11               |                          |
| Cut-off                      | ≤ 3,370.6                  | 3,370.6 < to ≤ 4,601.8 | > 4,601.8          | 0.758                    |
| OR (95% CI)                  | 1                          | 0.260 (0.05–1.25)      | 0.670 (0.16–2.90)  |                          |
| Potassium, mg                |                            |                        |                    |                          |
| Number of S/A                | 7/10                       | 15/11                  | 5/11               |                          |
| Cut-off                      | ≤ 1,951.7                  | 1,951.7 < to ≤ 2,966.7 | > 2,966.7          | 0.976                    |
| OR (95% CI)                  | 1                          | 3.940 (0.85–18.21)     | 1.359 (0.25–7.52)  |                          |
| Magnesium, mg                |                            |                        |                    |                          |
| Number of S/A                | 7/10                       | 8/11                   | 12/11              |                          |
| Cut-off                      | ≤ 45.3                     | 45.3 < to ≤ 81.6       | > 81.6             | 0.236                    |
| OR (95% CI)                  | 1                          | 1.536 (0.34–6.88)      | 2.425 (0.56–10.57) |                          |
| Iron, mg                     |                            |                        |                    |                          |
| Number of S/A                | 10/10                      | 8/11                   | 9/11               |                          |
| Cut-off                      | ≤ 10.6                     | 10.6 < to ≤ 15.3       | > 15.3             | 0.987                    |
| OR (95% CI)                  | 1                          | 0.598 (0.14–2.62)      | 0.912 (0.23–3.67)  |                          |
| Zinc, mg                     |                            |                        |                    |                          |
| Number of S/A                | 11/10                      | 8/11                   | 8/11               |                          |
| Cut-off                      | ≤ 7.0                      | 7.0 < to ≤ 10.4        | > 10.4             | 0.893                    |
| OR (95% CI)                  | 1                          | 0.845 (0.22–3.27)      | 0.906 (0.21–3.94)  |                          |
| Copper, mg                   |                            |                        |                    |                          |

**Supplementary Table 7. Continued**

| Variable      | Quartile of dietary intake |                   |                   | <i>p</i> for trend <sup>a</sup> |
|---------------|----------------------------|-------------------|-------------------|---------------------------------|
|               | Q <sub>1</sub>             | Q <sub>2</sub>    | Q <sub>3</sub>    |                                 |
| Number of S/A | 13/10                      | 8/11              | 6/11              |                                 |
| Cut-off       | ≤ 0.9                      | 0.9 < to ≤ 1.3    | > 1.3             | 0.310                           |
| OR (95% CI)   | 1                          | 0.664 (0.18–2.50) | 0.466 (0.11–1.92) |                                 |
| Selenium, μg  |                            |                   |                   |                                 |
| Number of S/A | 14/10                      | 6/11              | 7/11              |                                 |
| Cut-off       | ≤ 47.0                     | 47.0 < to ≤ 78.2  | > 78.2            | 0.371                           |
| OR (95% CI)   | 1                          | 0.417 (0.11–1.66) | 0.511 (0.13–2.05) |                                 |

S/A, symptomatic/asymptomatic; OR, odds ratio; CI, confidence interval; RE, retinol equivalent.

<sup>a</sup>Estimates of *p* values for a linear trend were based on linear scores derived from the medians of quartiles for intake of nutrients among asymptomatic.

<sup>b</sup>OR was adjusted for total energy, exercise frequency.
